# Supplementary material
Source: publisher site journal article supplement (https://www.dovepress.com/article/382109)
Supplement: Supplementary file 1 [file get_supplementary_file.php]

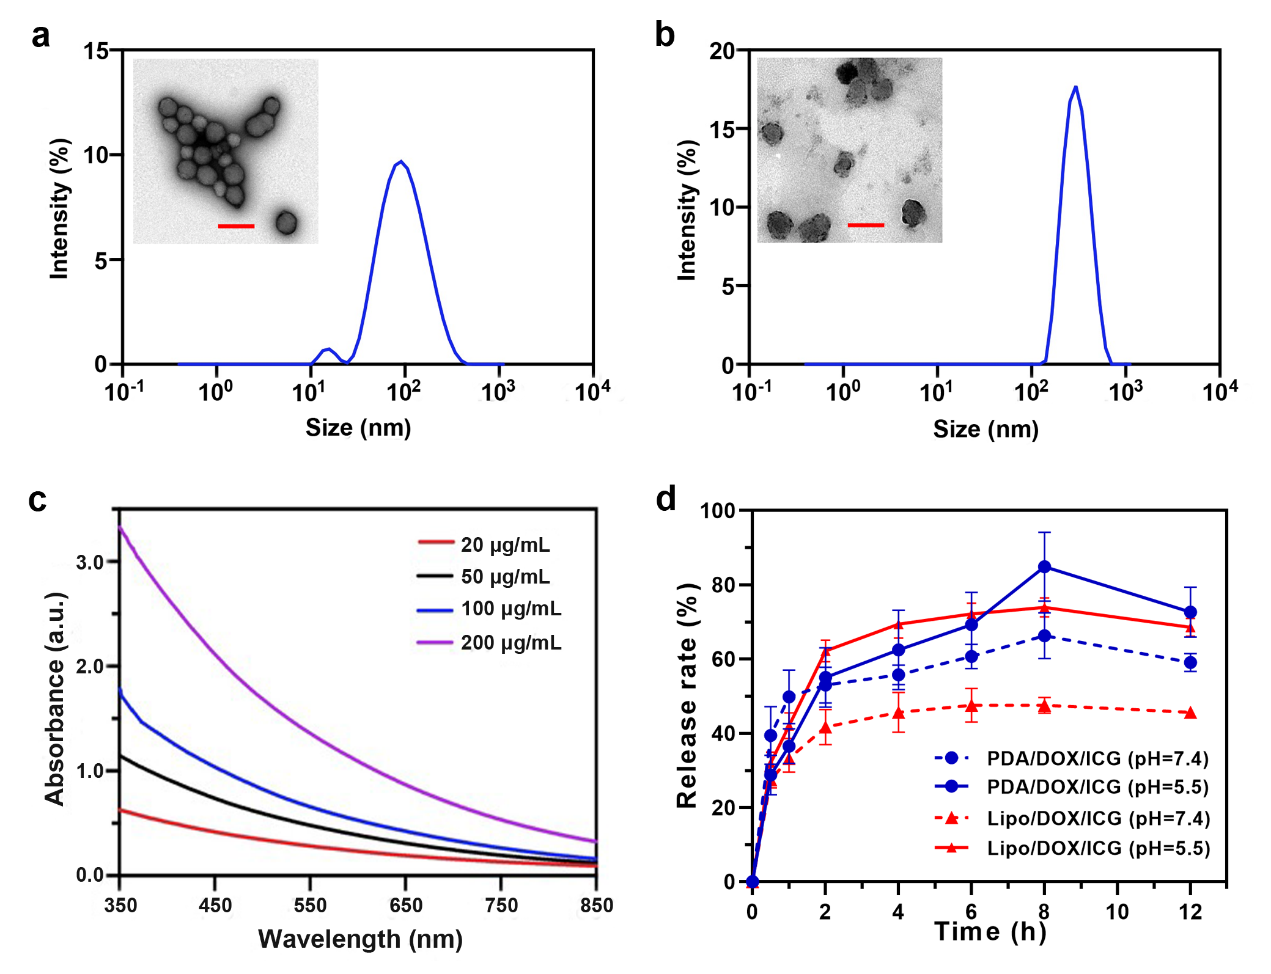


**Fig. S1** Size and morphology of Lipo/DOX@ICG **a** and PDA/DOX@ICG **b** measured using a Malvern Zetasizer Nano Series instrument and TEM. Scale bar for TEM is 100 nm. **c** UV-vis-NIR spectra of different concentrations of PDA@ Lipo. **d** DOX release from PDA/DOX@ICG and Lipo/DOX@ICG in different pH release media (pH = 7.4, 5.0) with or without laser irradiation (2.0 W, 5 min) at 0.5 h (n = 3 per group).


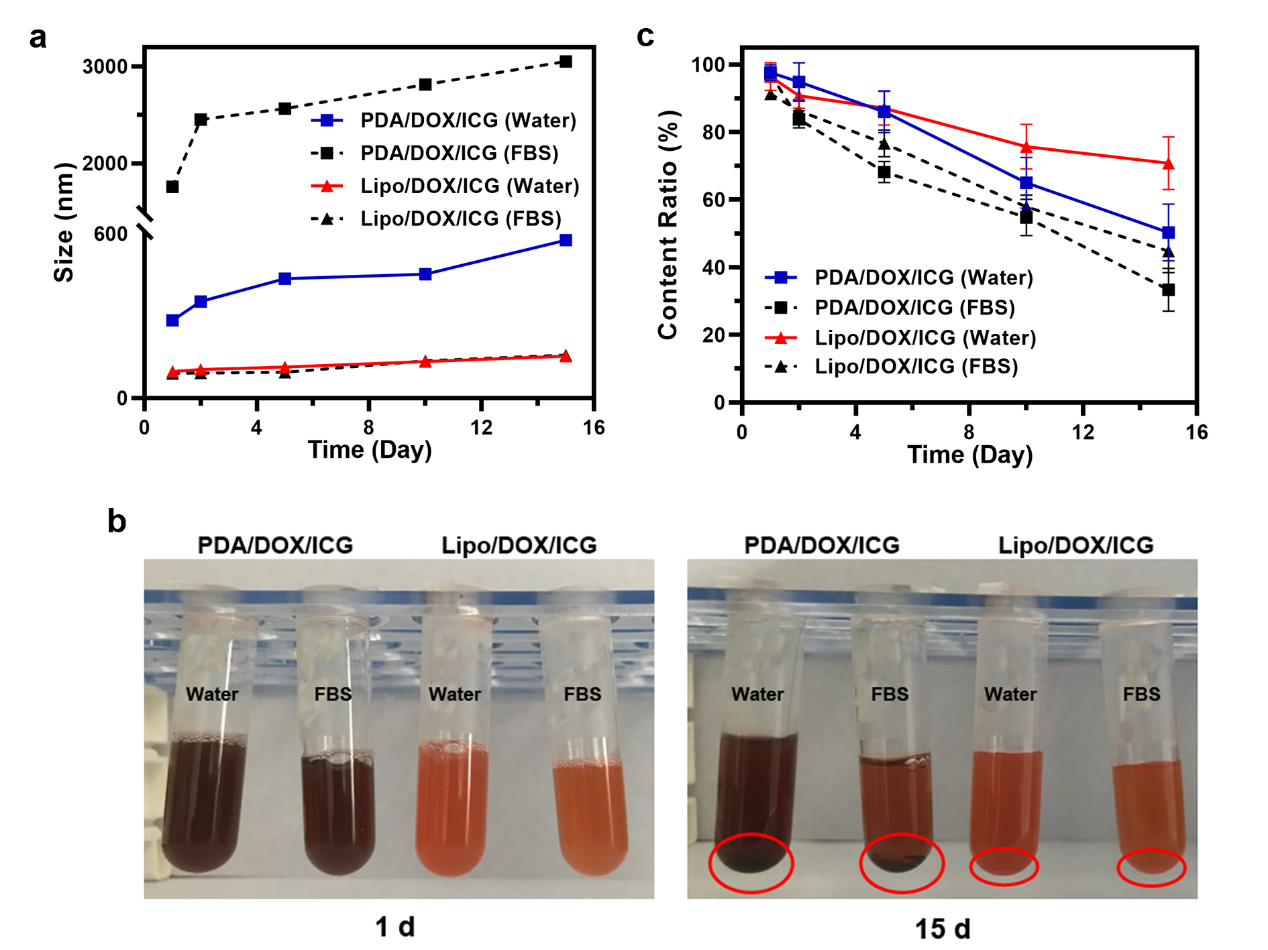


**Fig. S2** **a** The change of particle size of PDA/DOX@ICG and Lipo/DOX@ICG in aqueous solution and FBS. **b** The appearance comparison of PDA/DOX@ICG and Lipo/DOX@ICG before and after storage. **c** The content change of PDA/DOX@ICG and Lipo/DOX@ICG in water and FBS.


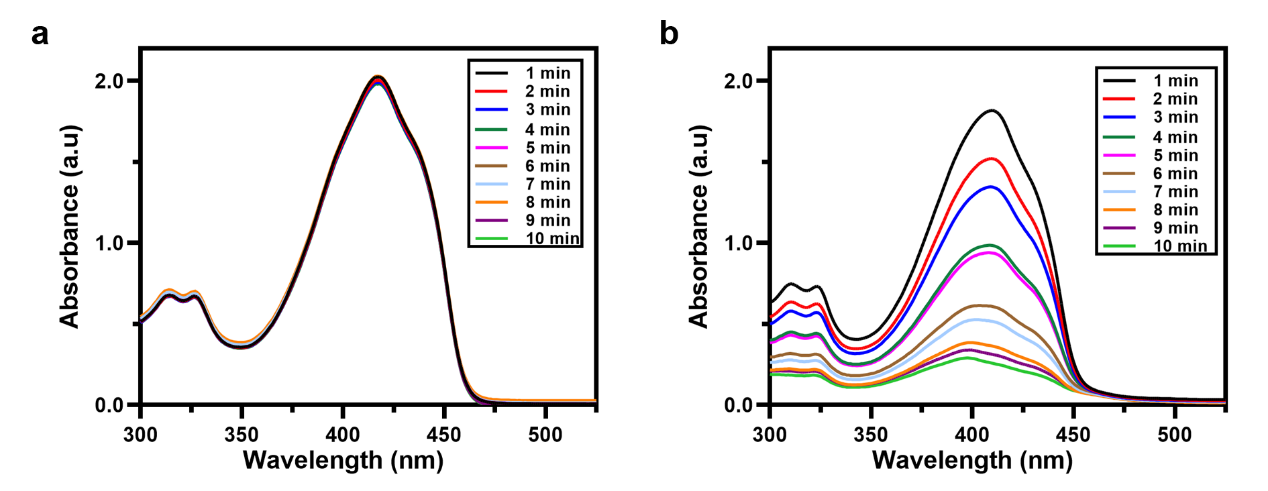


**Fig. S3** *In vitro* 1O2 detection of black DPBF **a** and free ICG **b** (containing 10 μg/mL ICG) using 1O2 probe DPBF, whose attenuation rate at 417 nm is directly proportional to the generation rate of 1O2 under 808 nm laser radiation (1.0 W/cm2, 10 min).

**
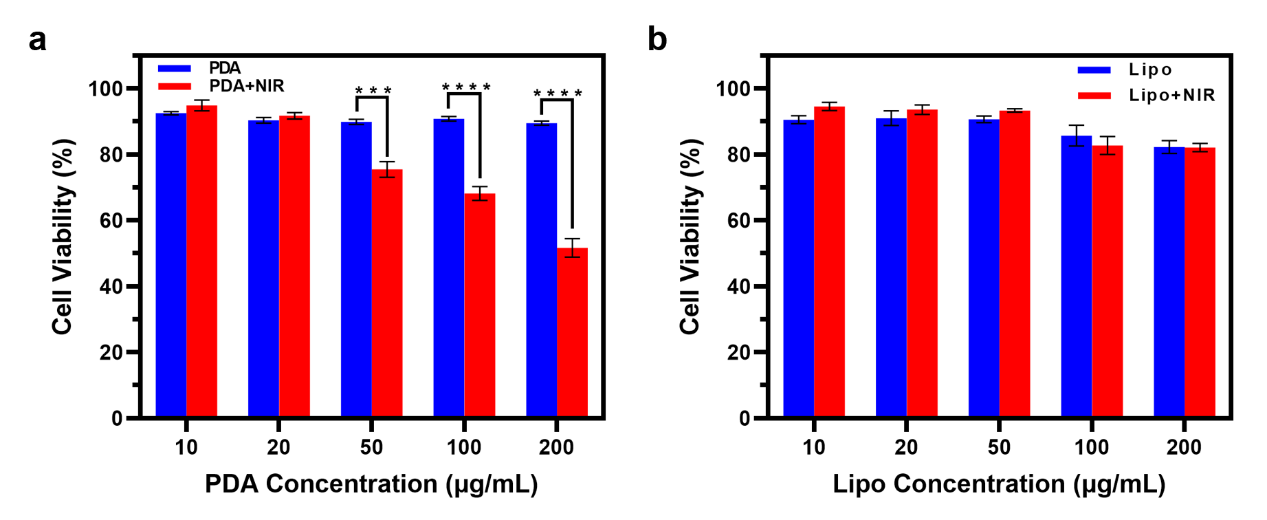
**

**Fig. S4** MTT assays of blank carrier PDA **a** and Lipo **b** over 24 h in MDA-MB-231 cells with/without irradiation (1.0 W/cm2, 2 min).

**
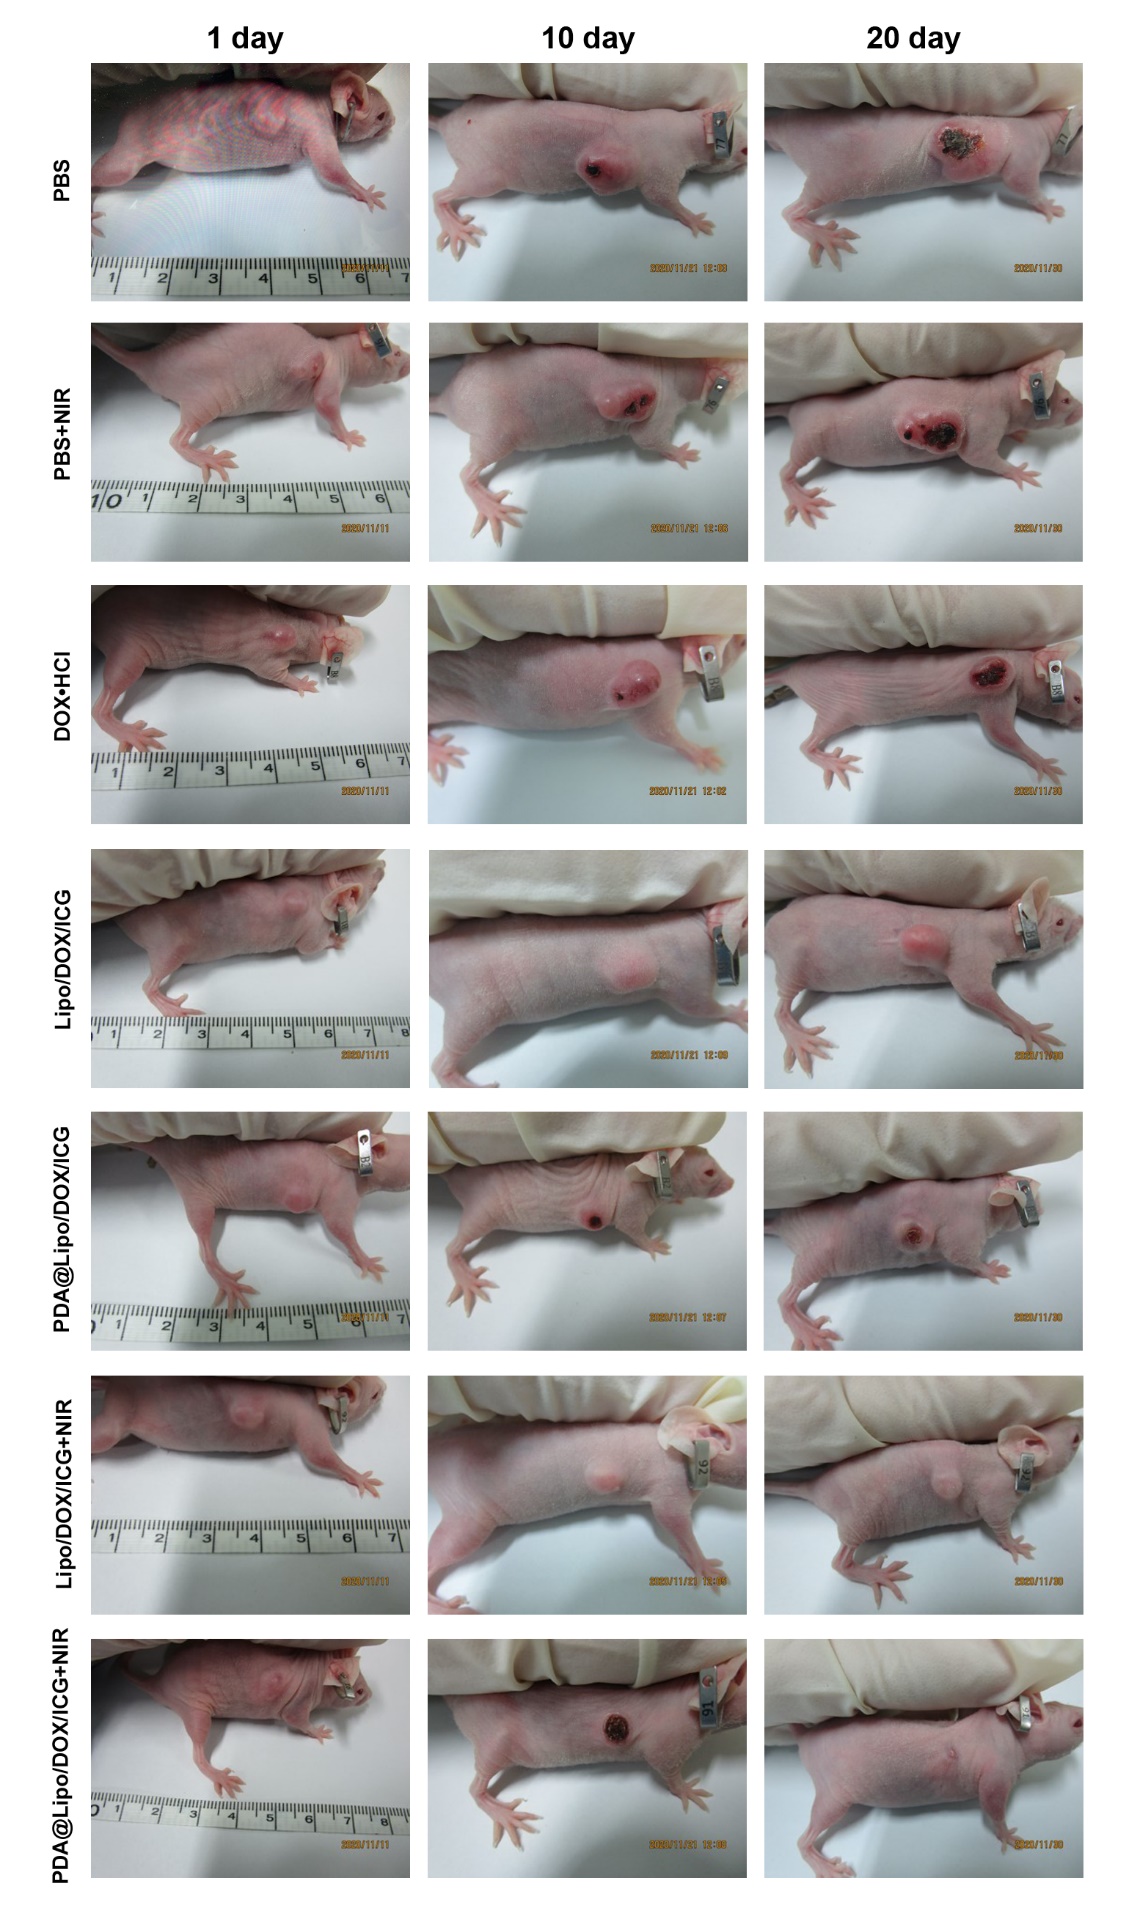
**

**Fig. S5** The pictures of tumor changes after different treatments.


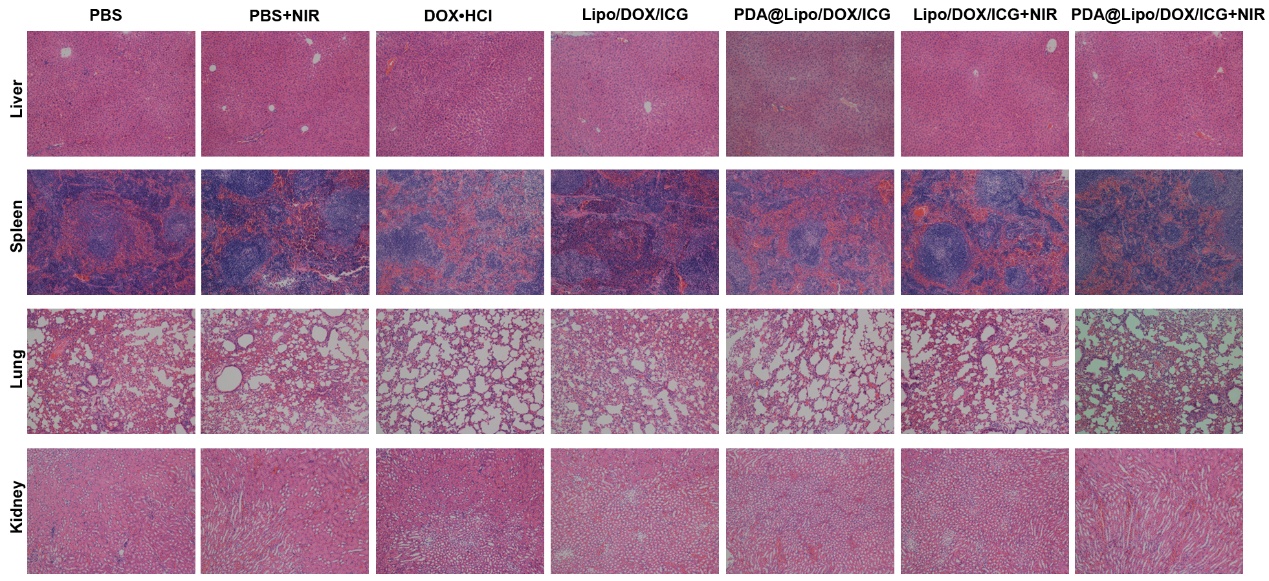


**Fig. S6** Representative histological images of liver, spleen, lung and kidney samples from the treated mice. (n = 5 per group).

Conflicts of interest

There are no conflicts to declare.
